# Supplementary material for: Structural dimension engineering and high-temperature dielectric–optical switching in fluorine-substituted lead bromide hybrid perovskites
Source: Royal Society of Chemistry journal article supplement (doi:10.1039/d3ce00644a), 2023-01-01
Supplement: d3ce00644a1.pdf [file d3ce00644a1.pdf]

# Structural dimension engineering and high-temperature dielectric-optical switchings in fluorine-substituted lead-bromide hybrid perovskites

Tian Gan,<sup>a</sup> Zhe-Kun Xu,<sup>a</sup> Jia-Qi Gan<sup>a</sup> and Zhong-Xia Wang<sup>\*a,b</sup>

<sup>a</sup> Ordered Matter Science Research Center, Nanchang University, Nanchang 330031, People's Republic of China.

<sup>b</sup> College of Chemistry and Chemical Engineering, Gannan Normal University, Ganzhou 341000, People's Republic of China.

\*Email: zhongxiawang@ncu.edu.cn

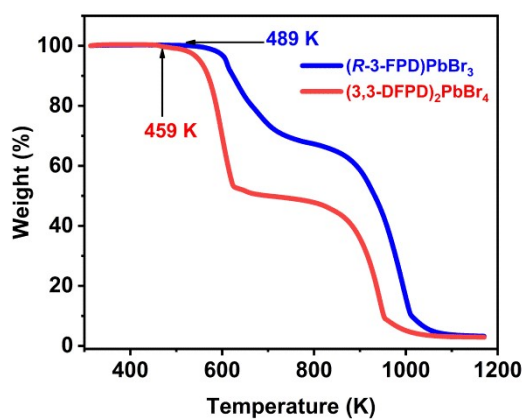

**Fig. S1** TGA curves of  $(R-3-FPD)PbBr_3$  and  $(3,3-DFPD)_2PbBr_4$ .

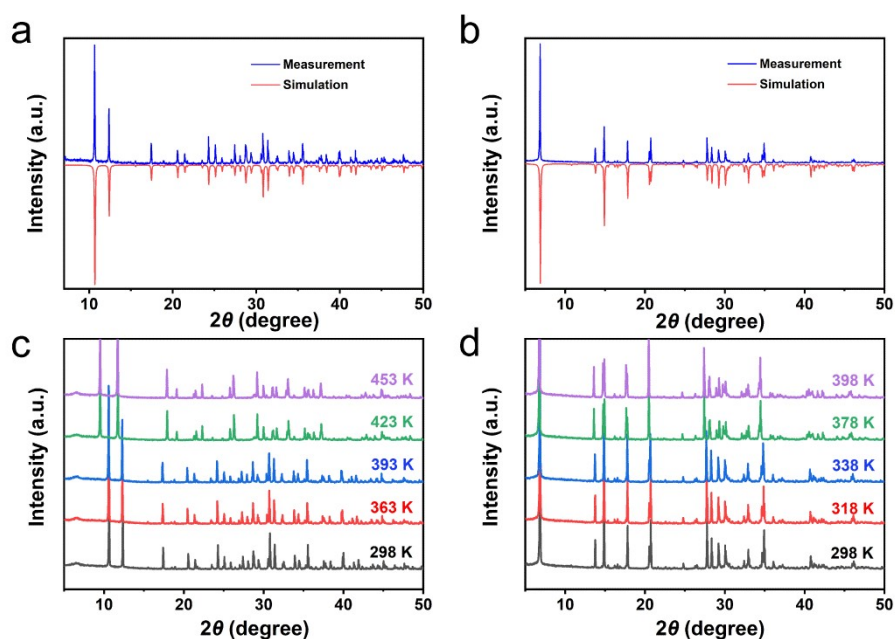

**Fig. S2** The measured and simulated PXRD patterns for  $(R-3\text{-FPD})\text{PbBr}_3$  (a) and  $(3,3\text{-DFPD})_2\text{PbBr}_4$  (b) at room temperature. Variable-temperature PXRD patterns for  $(R-3\text{-FPD})\text{PbBr}_3$  (c) and  $(3,3\text{-DFPD})_2\text{PbBr}_4$  (d).

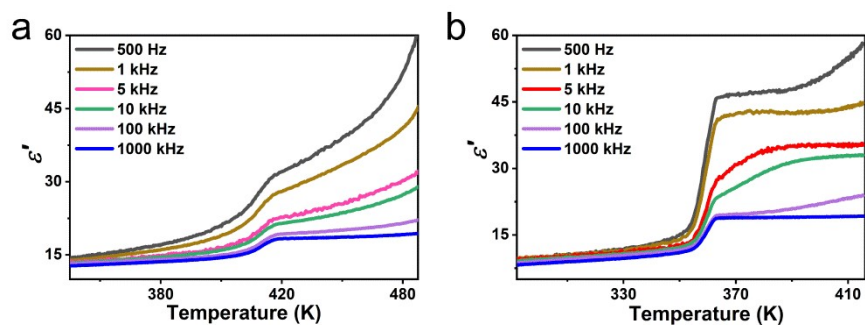

**Fig. S3** Temperature dependence of the real part ( $\epsilon'$ ) of the dielectric constant of  $(R-3\text{-FPD})\text{PbBr}_3$  (a) and  $(3,3\text{-DFPD})_2\text{PbBr}_4$  (b) at different frequencies in a heating run.

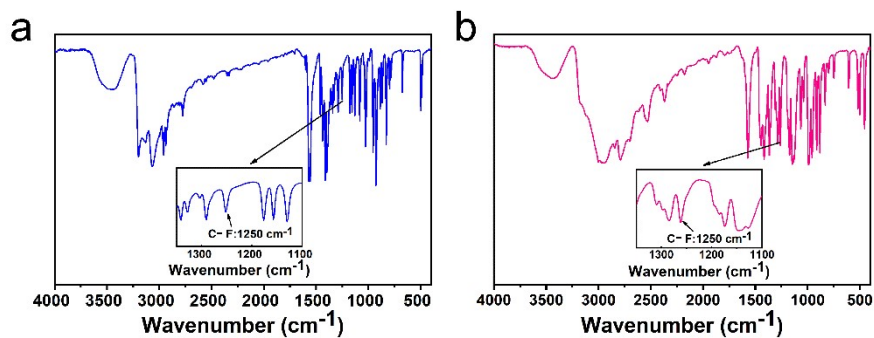

**Fig. S4** IR spectra for  $(R-3\text{-FPD})\text{PbBr}_3$  (a) and  $(3,3\text{-DFPD})_2\text{PbBr}_4$  (b). The insets denote the C-F vibration at around  $1250\text{ cm}^{-1}$ .

**Table S1** Crystal data and structure refinement for (*R*-3-FPD)PbBr<sub>3</sub> and (3,3-DFPD)<sub>2</sub>PbBr<sub>4</sub>.

| Compound                              | [ <i>R</i> -3-FPD]PbBr <sub>3</sub>                   | [3,3-DFPD] <sub>2</sub> PbBr <sub>4</sub>                                                     |
|---------------------------------------|-------------------------------------------------------|-----------------------------------------------------------------------------------------------|
| Temperature/K                         | 293                                                   | 293                                                                                           |
| Empirical formula                     | C <sub>5</sub> H <sub>11</sub> Br <sub>3</sub> FNPb   | C <sub>20</sub> H <sub>40</sub> Br <sub>8</sub> F <sub>8</sub> N <sub>4</sub> Pb <sub>2</sub> |
| Formula weight/g mol <sup>-1</sup>    | 551.07                                                | 1542.22                                                                                       |
| Crystal system                        | orthorhombic                                          | tetragonal                                                                                    |
| Space group                           | <i>P</i> 2 <sub>1</sub> 2 <sub>1</sub> 2 <sub>1</sub> | <i>P</i> 4 <sub>1</sub> 2 <sub>1</sub> 2                                                      |
| <i>a</i> /Å                           | 7.8341(5)                                             | 12.2050(3)                                                                                    |
| <i>b</i> /Å                           | 10.1533(6)                                            | 12.2050(3)                                                                                    |
| <i>c</i> /Å                           | 14.2642(9)                                            | 51.295(3)                                                                                     |
| <i>α</i> /°                           | 90                                                    | 90                                                                                            |
| <i>β</i> /°                           | 90                                                    | 90                                                                                            |
| <i>γ</i> /°                           | 90                                                    | 90                                                                                            |
| Volume/Å <sup>3</sup>                 | 1134.60(12)                                           | 7641.0(6)                                                                                     |
| <i>Z</i>                              | 4                                                     | 8                                                                                             |
| <i>D<sub>c</sub></i> /cm <sup>3</sup> | 3.226                                                 | 2.681                                                                                         |
| <i>F</i> (000)                        | 976                                                   | 5632                                                                                          |
| <i>GOF</i>                            | 1.011                                                 | 1.040                                                                                         |
| <i>R</i> <sub>1</sub>                 | 0.0658                                                | 0.071                                                                                         |
| <i>wR</i> <sub>2</sub>                | 0.1687                                                | 0.1575                                                                                        |

**Table S2** Selected Pb–Br bond lengths [Å] and Br–Pb–Br bond angles [°] for (*R*-3-FPD)PbBr<sub>3</sub>.

| Atoms                                  | Length/Å   | Atoms                                  | Length/Å   |
|----------------------------------------|------------|----------------------------------------|------------|
| Pb1-Br2 <sup>1</sup>                   | 2.9258(16) | Pb1-Br3                                | 3.1419(16) |
| Pb1-Br2                                | 3.1999(16) | Pb1-Br4 <sup>1</sup>                   | 3.2323(15) |
| Pb1-Br3 <sup>1</sup>                   | 2.9351(16) | Pb1-Br4                                | 2.8657(15) |
| Atoms                                  | Angle/°    | Atoms                                  | Angle/°    |
| Br2 <sup>1</sup> -Pb1-Br2              | 172.00(5)  | Br3 <sup>1</sup> -Pb1-Br4 <sup>1</sup> | 81.66(4)   |
| Br2 <sup>1</sup> -Pb1-Br3              | 95.34(4)   | Br4-Pb1-Br2                            | 83.29(4)   |
| Br2 <sup>1</sup> -Pb1-Br3 <sup>1</sup> | 88.45(5)   | Br4-Pb1-Br2 <sup>1</sup>               | 89.65(5)   |
| Br2 <sup>1</sup> -Pb1-Br4 <sup>1</sup> | 81.79(4)   | Br4-Pb1-Br3 <sup>1</sup>               | 88.94(4)   |
| Br2-Pb1-Br4 <sup>1</sup>               | 105.78(4)  | Br4-Pb1-Br3                            | 84.34(4)   |
| Br3-Pb1-Br2                            | 80.27(4)   | Br4-Pb1-Br4 <sup>1</sup>               | 167.41(4)  |
| Br3 <sup>1</sup> -Pb1-Br2              | 95.15(4)   | Pb1 <sup>2</sup> -Br2-Pb1              | 79.43(4)   |
| Br3 <sup>1</sup> -Pb1-Br3              | 172.25(5)  | Pb1 <sup>2</sup> -Br3-Pb1              | 80.26(3)   |
| Br3-Pb1-Br4 <sup>1</sup>               | 105.54(4)  | Pb1-Br4-Pb1 <sup>2</sup>               | 79.76(4)   |

Symmetry codes: <sup>1</sup>-1/2+X, 3/2-Y, 1-Z; <sup>2</sup>1/2+X, 3/2-Y, 1-Z

**Table S3** Hydrogen bonds for (*R*-3-FPD)PbBr<sub>3</sub>.

| D-Hd···A                        | d(D-H)/Å | d(H···A)/Å | d(D···A)/Å | <DHA/° |
|---------------------------------|----------|------------|------------|--------|
| N(1)-H(1A)···Br(4) <sup>2</sup> | 0.89     | 2.90       | 3.463(11)  | 122.9  |
| N(1)-H(1B)···Br(3)              | 0.89     | 2.64       | 3.484(12)  | 158.1  |
| C(4)-H(4B)···F(3) <sup>1</sup>  | 0.97     | 2.57       | 3.177(19)  | 120.6  |
| N(1)-H(1B)···F(3) <sup>1</sup>  | 0.89     | 2.57       | 2.896(16)  | 102.7  |
| N(1)-H(1A)···F(3) <sup>1</sup>  | 0.89     | 2.64       | 2.896(16)  | 97.7   |

Symmetry codes: <sup>1</sup>-1/2+X, 5/2-Y, 1-Z; <sup>2</sup>1/2+X, 3/2-Y, 1-Z**Table S4** Selected Pb–Br bond lengths [Å] and Br–Pb–Br bond angles [°] for (3,3-DFPD)<sub>2</sub>PbBr<sub>4</sub>.

| Atoms                     | Length/Å    | Atoms                      | Length/Å    |
|---------------------------|-------------|----------------------------|-------------|
| Pb1-Br3                   | 2.9906(15)  | Pb2-Br5 <sup>2</sup>       | 3.1978(14)  |
| Pb1-Br6                   | 2.9514(14)  | Pb2-Br5                    | 2.9533(14)  |
| Pb1-Br6 <sup>1</sup>      | 3.1817(15)  | Pb2-Br8                    | 3.0749(15)  |
| Pb1-Br7                   | 2.9931(15)  | Pb2-Br9                    | 2.8736(14)  |
| Pb1-Br10                  | 2.8735(14)  | Pb2-Br10                   | 3.2699(14)  |
| Pb2-Br4                   | 2.9207(14)  |                            |             |
| Atoms                     | Angle/°     | Atoms                      | Angle/°     |
| Br3-Pb1-Br6 <sup>1</sup>  | 89.50(4)    | Br5-Pb2-Br5 <sup>2</sup>   | 175.689(17) |
| Br3-Pb1-Br7               | 171.75(4)   | Br5-Pb2-Br8                | 83.09(4)    |
| Br6-Pb1-Br3               | 89.29(4)    | Br5 <sup>2</sup> -Pb2-Br10 | 74.80(4)    |
| Br6-Pb1-Br6 <sup>1</sup>  | 177.934(18) | Br5-Pb2-Br10               | 103.39(5)   |
| Br6-Pb1-Br7               | 82.47(4)    | Br8-Pb2-Br5 <sup>2</sup>   | 100.92(4)   |
| Br7-Pb1-Br6 <sup>1</sup>  | 98.75(4)    | Br8-Pb2-Br10               | 95.38(4)    |
| Br10-Pb1-Br3              | 91.07(5)    | Br9-Pb2-Br4                | 88.57(5)    |
| Br10-Pb1-Br6              | 89.47(5)    | Br9-Pb2-Br5                | 89.25(5)    |
| Br10-Pb1-Br6 <sup>1</sup> | 92.23(5)    | Br9-Pb2-Br5 <sup>2</sup>   | 92.40(4)    |
| Br10-Pb1-Br7              | 88.42(5)    | Br9-Pb2-Br8                | 88.84(4)    |
| Br4-Pb2-Br5 <sup>2</sup>  | 88.63(4)    | Br9-Pb2-Br10               | 167.05(5)   |
| Br4-Pb2-Br5               | 87.43(4)    | Pb2-Br5-Pb2 <sup>3</sup>   | 166.33(6)   |
| Br4-Pb2-Br8               | 170.21(4)   | Pb1-Br6-Pb1 <sup>4</sup>   | 168.79(7)   |
| Br4-Pb2-Br10              | 89.20(4)    | Pb1-Br10-Pb2               | 176.63(7)   |

Symmetry codes: <sup>1</sup>1/2+X,-1/2-Y,-1/4-Z; <sup>2</sup>-1/2+X, -3/2-Y, -1/4-Z; <sup>3</sup>1/2+X,-3/2-Y,-1/4-Z; <sup>4</sup>-1/2+X, -1/2-Y, -1/4-Z

**Table S5** Hydrogen bonds for (3,3-DFPD)<sub>2</sub>PbBr<sub>4</sub>.

| D-Hd···A                          | d(D-H)/Å | d(H···A)/Å | d(D···A)/Å | <DHA/° |
|-----------------------------------|----------|------------|------------|--------|
| N(3)-H(3A)···Br(7) <sup>1</sup>   | 0.89     | 2.6        | 3.476(15)  | 168.4  |
| N(1)-H(1A)···Br(8)                | 0.89     | 2.44       | 3.312(12)  | 166.9  |
| N(4)-H(4A)···Br(7) <sup>3</sup>   | 0.89     | 2.48       | 3.371(12)  | 176.4  |
| N(4)-H(4B)···Br(3) <sup>1</sup>   | 0.89     | 2.49       | 3.349(11)  | 161.8  |
| N(15)-H(15A)···Br(8) <sup>5</sup> | 0.89     | 2.6        | 3.492(19)  | 178.1  |
| N(15)-H(15B)···Br(4)              | 0.89     | 2.47       | 3.319(18)  | 159.4  |
| C(1)-H(1C)···F(74) <sup>2</sup>   | 0.97     | 2.42       | 3.36(2)    | 163.0  |
| C(6)-H(6B)···F(21)                | 0.97     | 2.43       | 3.39(2)    | 173.3  |
| C(18)-H(18A)···F(8)               | 0.97     | 2.38       | 3.35(2)    | 177.6  |
| C(45)-H(45B)···F(74) <sup>6</sup> | 0.97     | 2.44       | 3.36(2)    | 158.3  |

Symmetry codes: <sup>1</sup>1/2-X,1/2+Y,1/4-Z; <sup>2</sup>1/2-Y,-1/2+X,1/4+Z; <sup>3</sup>1+X,1+Y,+Z; <sup>4</sup>3/2-X,1/2+Y,1/4-Z; <sup>5</sup>1/2-X,-1/2+Y,1/4-Z; <sup>6</sup>1+Y,-1+X,-Z
